# Supplementary material for: Local spatial structure of forest biomass and its consequences for remote sensing of carbon stocks
Source: Copernicus journal article supplement (doi:10.5194/bg-11-6827-2014), 2014-12-08
Supplement: Supplementary file [file bg-11-6827-2014-supplement.pdf]

Supplement of Biogeosciences, 11, 6827–6840, 2014  
<http://www.biogeosciences.net/11/6827/2014/>  
doi:10.5194/bg-11-6827-2014-supplement  
© Author(s) 2014. CC Attribution 3.0 License.

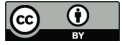

*Supplement of*

## **Local spatial structure of forest biomass and its consequences for remote sensing of carbon stocks**

**M. Réjou-Méchain et al.**

*Correspondence to:* M. Réjou-Méchain (maxime.rejou@gmail.com)

## SUPPLEMENT

### Supplement S1: Analyzing the spatial structure in AGBD with wavelet analysis

To investigate the contribution of variation at different scales to the spatial structure of AGBD within field plots, we used wavelet-kernel functions (Percival, 1995). The wavelet transform analyzes the variance across spatial scales  $s$  by decomposing the signal into an orthonormal wavelet basis. The wavelet transform is defined as

$$W_f(\mathbf{b}, s, \theta) = s^{-1} \int f(\mathbf{x}') \phi_s^*(\mathbf{x}' - \mathbf{b}) d\mathbf{x}'$$

where  $f(\mathbf{x})$  is the raster of the AGBD at the smallest field resolution (5 m x 5 m pixel),  $\phi_s^*(\mathbf{x} - \mathbf{b})$  is the complex conjugate of the scaled and translated mother wavelet,  $s$  is the scale at which the transform is applied, and  $\mathbf{b}$  is the translation vector. The convolution is efficiently computed using fast Fourier routines. We used an isotropic Morlet wavelet, with Fourier transform given by

$$\hat{\phi}_s = \frac{s}{c_\phi} \exp \left[ -\frac{1}{2} (s\mathbf{k} - k_0)^2 \right]$$

The functions  $\phi$  are essentially band-pass filters whose properties depend on the associated scaling parameter,  $s$ . They enable a focus on features of the process whose detail matches their scale parameters, i.e., broad features for large  $s$  and fine features for small  $s$ . We compute the wavelet variance or spectrum,  $S_{ff}(s)$ , as

$$S_{ff}(s, \theta) = \int_A |W_f(\mathbf{b}, s)|^2 d\mathbf{b}$$

We then normalized by the total variance to obtain the normalized wavelet variances.

## Supplement S2: An alternative reliability study approach

In this reliability study, we assumed that additional subplots (i.e. replicates) of 0.04 ha (n=19), 0.1 ha (n=9), 0.25 ha (n=4), 0.5 ha (n=2), 1 ha (n=1) and 2 ha (n=1) were established randomly inside the 4-ha pixel. The numbers of additional subplots were chosen to be realistic and increasing these numbers did not **substantially** affect the results (not shown). Two cases were simulated: additional subplots did not overlap each other or with the original subplot (“Replicate *Rr*”) or additional subplots were allowed to overlap each other or the original subplot (“Replicate *Rr* Overlap”). The original subplot and the replicates were then used to calculate the ICC considering the 4-ha pixel as factor in the one-way analysis of variance (see methods). Results showed that “Replicate *Rr*” tended to overestimate the correction needed for all subplot areas, **while the** “Replicate *Rr* Overlap” overestimated the correction needed for small subplot **and underestimated** the correction for larger subplot areas (Fig. S3). In all cases, these corrections did not outperform the “within subplot *Rr*” bootstrap approach for a given surveyed area.

## FIGURES

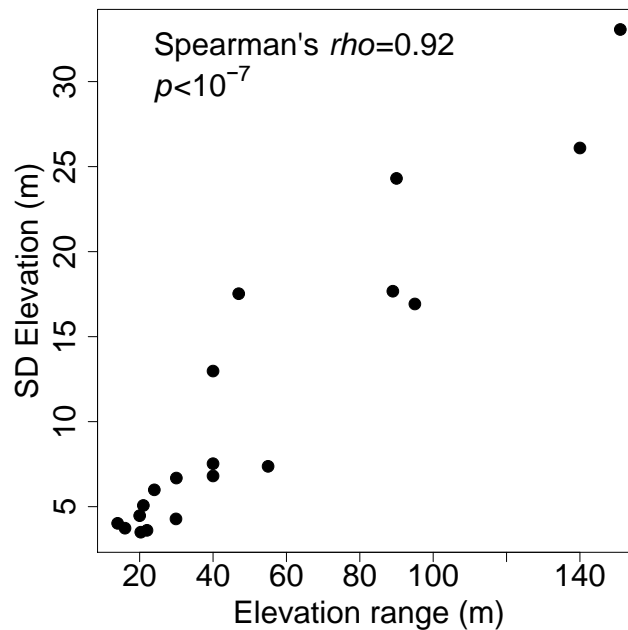

Figure S1. Relation between the **elevation** range and the mean standard deviation (SD) of elevation within 1-ha subplots in 19 study sites. Because elevation range is dependent not only upon topographical **variability** but also on plot size, we examined how elevation range correlated with a plot-size-independent measure of topographical **variability**, specifically the mean standard deviation of elevation within 1-ha subplots. Pearson's correlation test results are given within the panel. The SD of elevation was calculated for each discrete 1-ha within each plot from elevation maps of 20 m resolution, and then averaged over 1-ha subplots within each plot (the SD of elevation was almost insensitive to the resolution grain size, result not shown). All sites for which elevation maps were available were included in this analysis (Amacayacu, Barro Colorado Island, Fushan, Haliburton, Huai Kha Khaeng, Ituri Eodoro1, Ituri Eodoro2, Ituri Lenda1, Ituri Lenda2, Korup, Luquillo, Manaus, Mudumalai, Nouragues, Palanan, Paracou, Pasoh, Sinharaja, Yasuni).

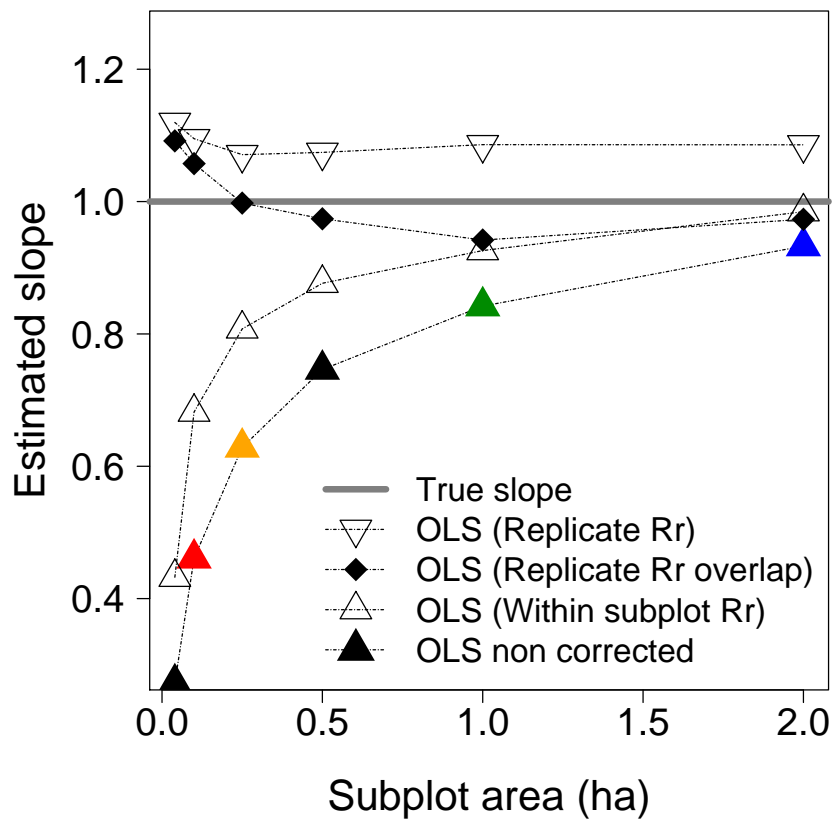

Figure S2. Effects on estimated regression slopes of an alternative reliability study approaches employing additional subplots established randomly inside the 4-ha pixel (Appendix S2). See Appendix S2 and figure 7 of the main manuscript for details.

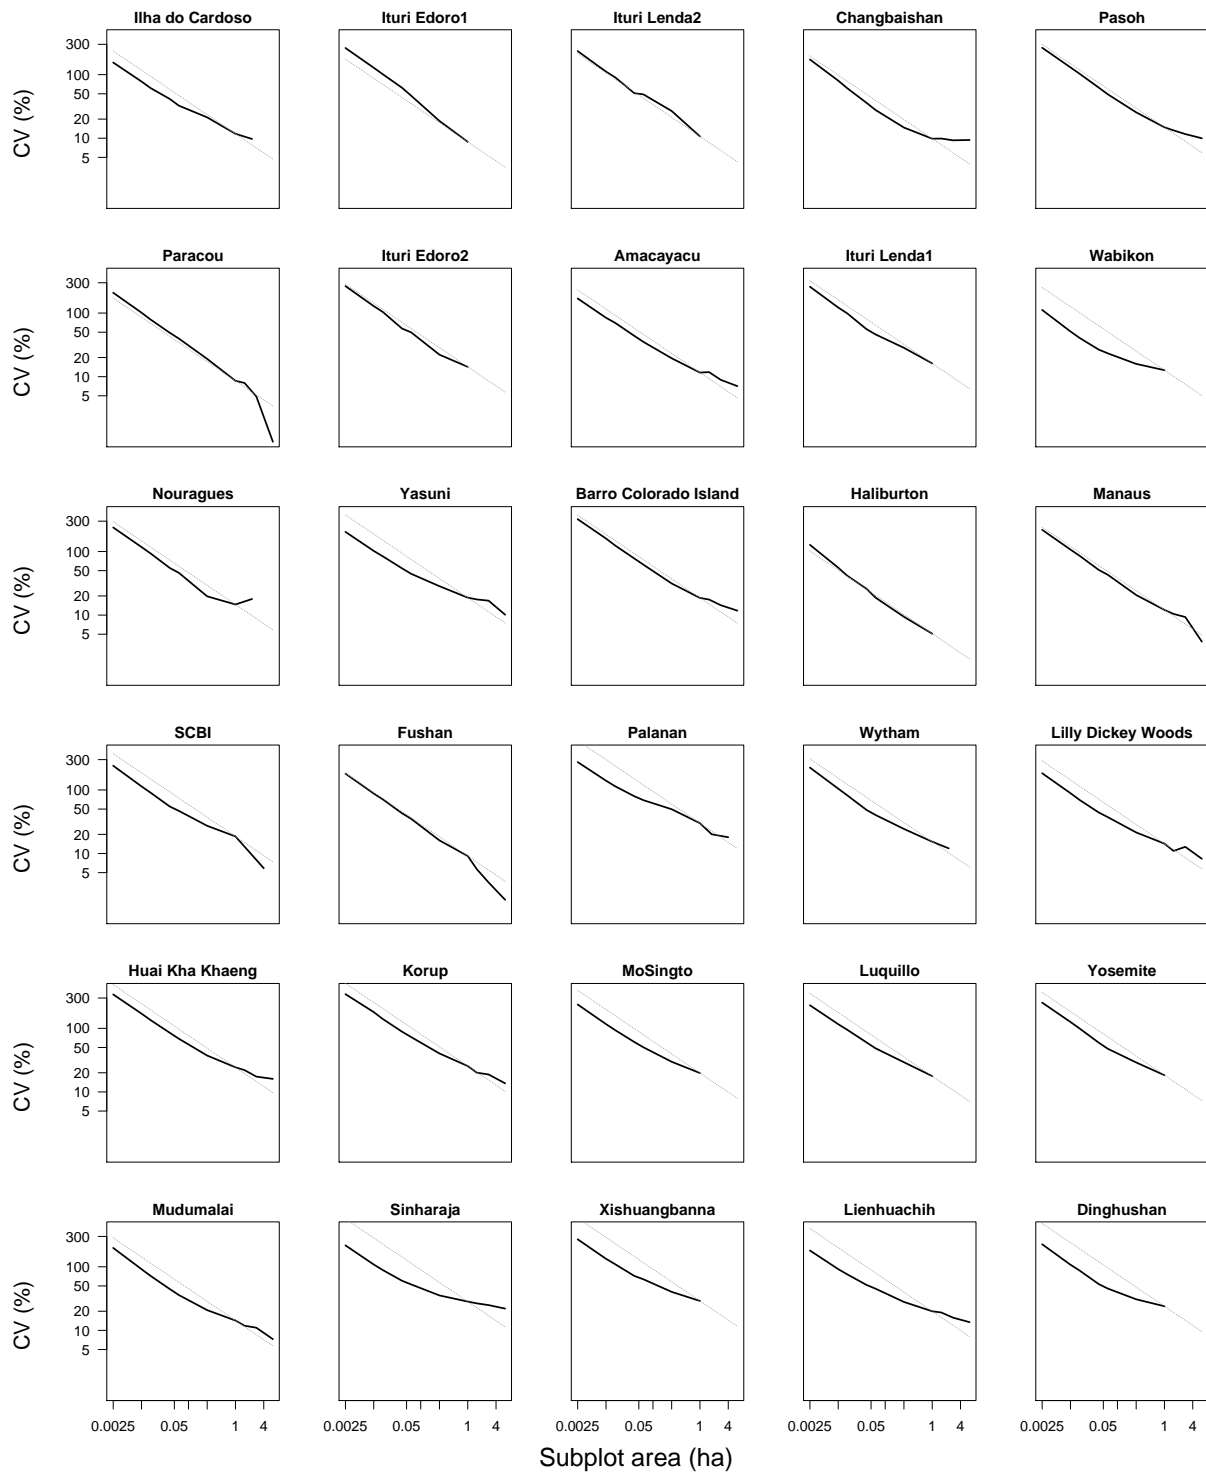

Figure S3. **Spatial variation** in AGBD as a function of spatial scale within each site. The coefficient of variation ( $CV$ ) of AGBD among subplots is plotted as a function of subplot area, with both on log scales. The grey dotted lines represent the fitted theoretical lines expected if no spatial autocorrelation occurs and  $CV$ s at any scale can be predicted from  $CV(1)$ , the observed  $CV$  at 1-ha scales, as  $CV(s) = CV(1) \times s^{-\frac{1}{2}}$ . Panels are ordered by elevation range.

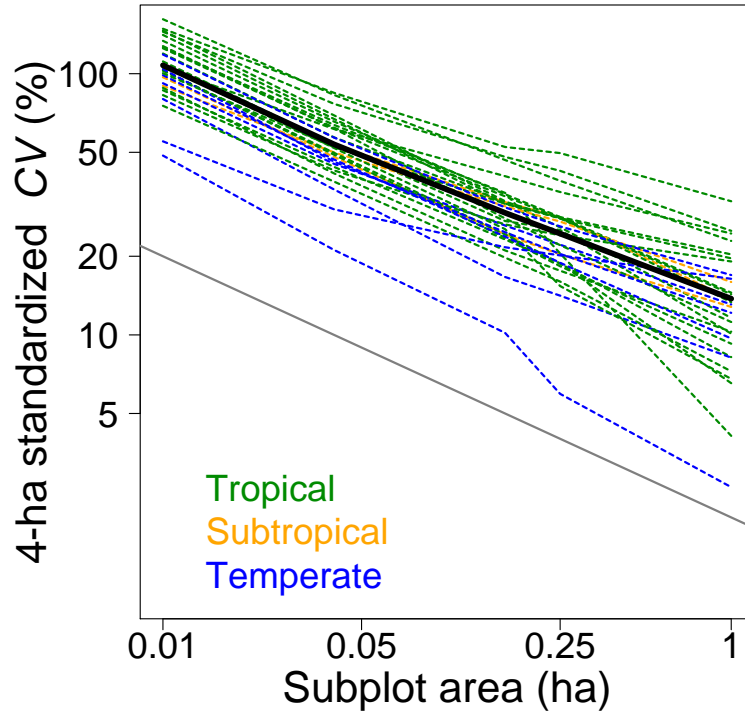

Figure S4. Local spatial variability in AGBD within 4-ha subplots at each site (one dashed line per site) and the mean over all sites (solid black line) as a function of spatial scale. For each site, the spatial variability at a given spatial scale was quantified as the mean coefficient of variation (CV) of AGBD for square subplots that gridded entire 4-ha subplots, with the mean taken over 1000 randomly placed 4-ha subplots. The rate of decline deviated somewhat from the slope of -0.5 (on log-log scales) expected in the absence of spatial autocorrelation in AGBD (solid grey reference line).

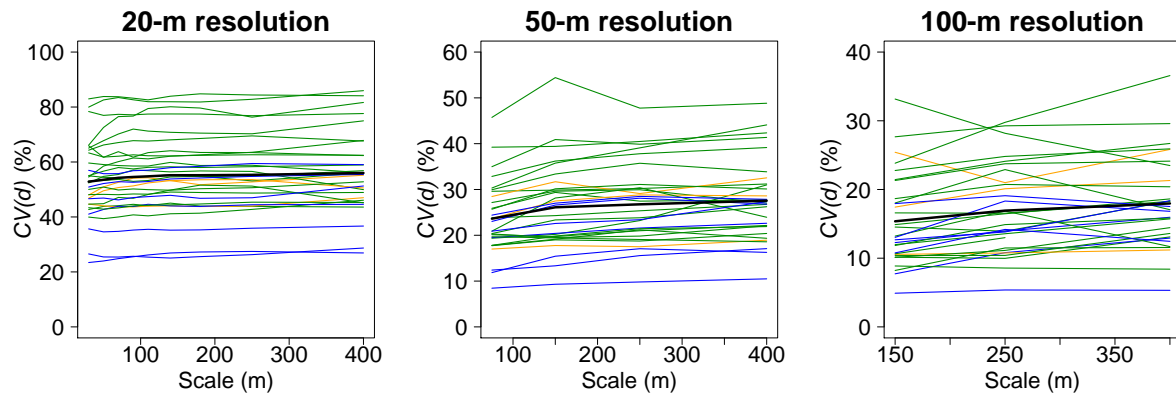

Figure S5. Variograms for AGBD in square subplots of 20, 50 and 100-m resolution for each site (colored lines) together with the average across sites (thick black line). Variances were transformed into distance-specific coefficients of variation (CV(d); see methods). Line color indicates forest type as in Fig. S4: tropical (green), subtropical (orange) and temperate (blue). To best represent the variability at each spatial resolution, the scale of the y-axis changes between panels.



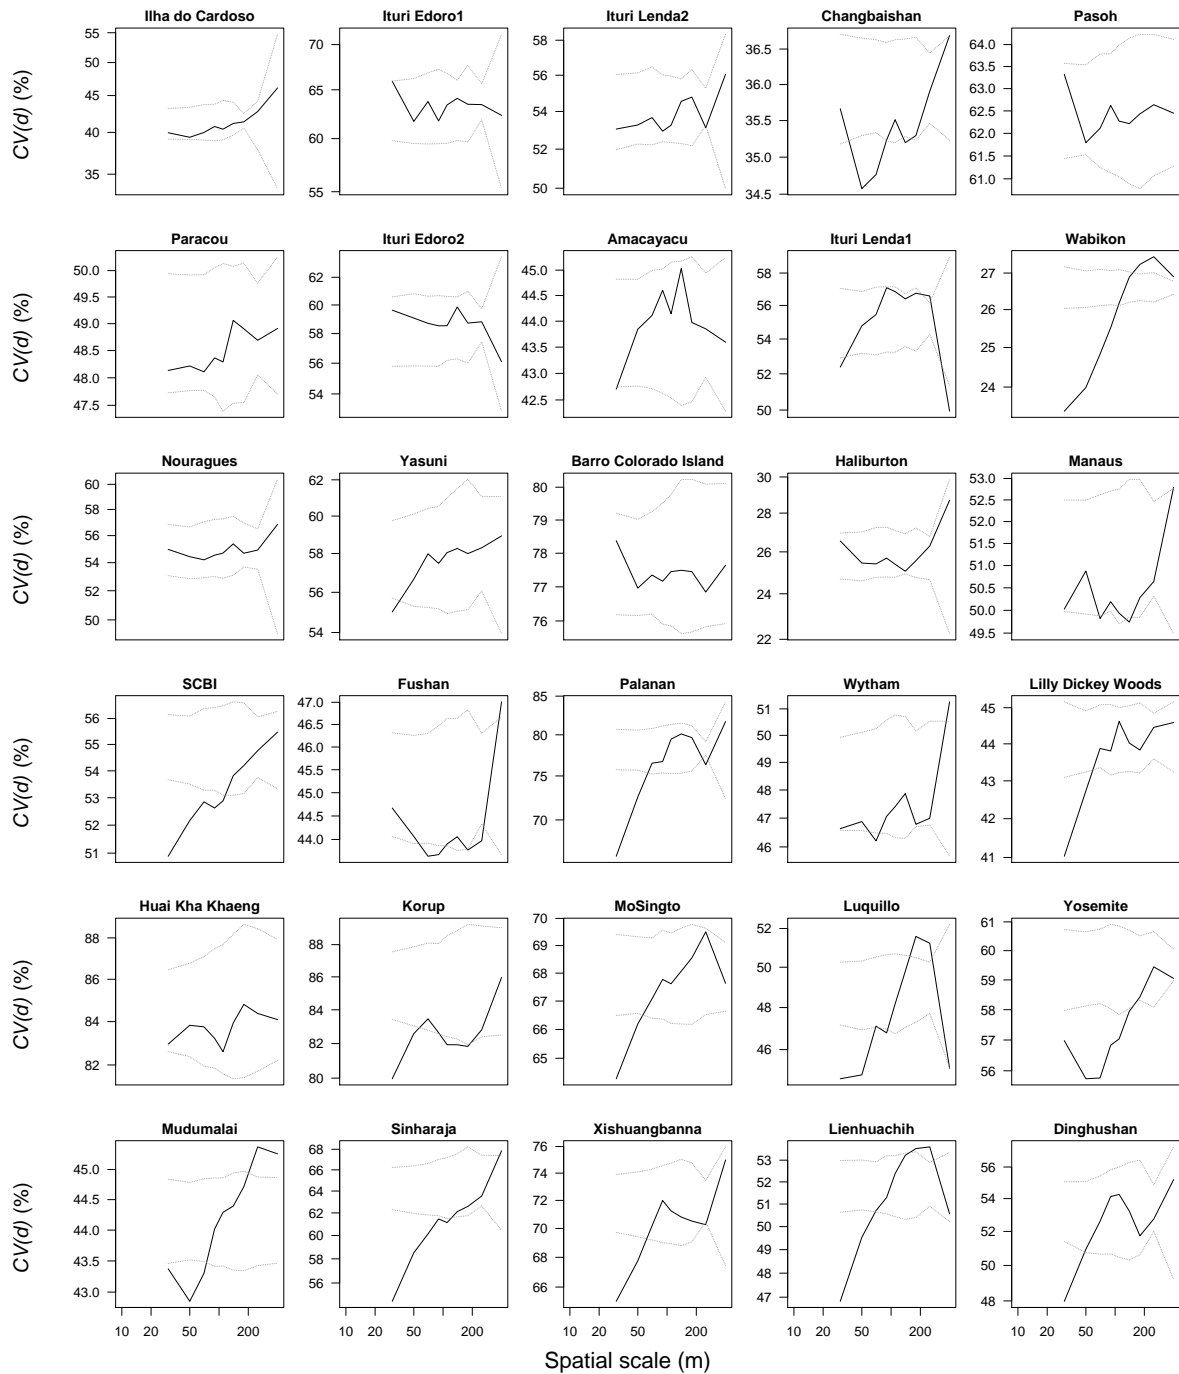

Figure S6. Variograms for AGBD in 20 x 20 m (0.04 ha) quadrats, for each site. For comparison purpose, variances were transformed into distance-specific coefficients of variation ( $CV(d)$ ; see methods). The grey dotted lines show the 95% confidence intervals on the null hypothesis of no spatial autocorrelation, as computed from 500 permutations (data values were randomly assigned to spatial locations). Panels are ordered by elevation range. Note that the y axis varies among panels.

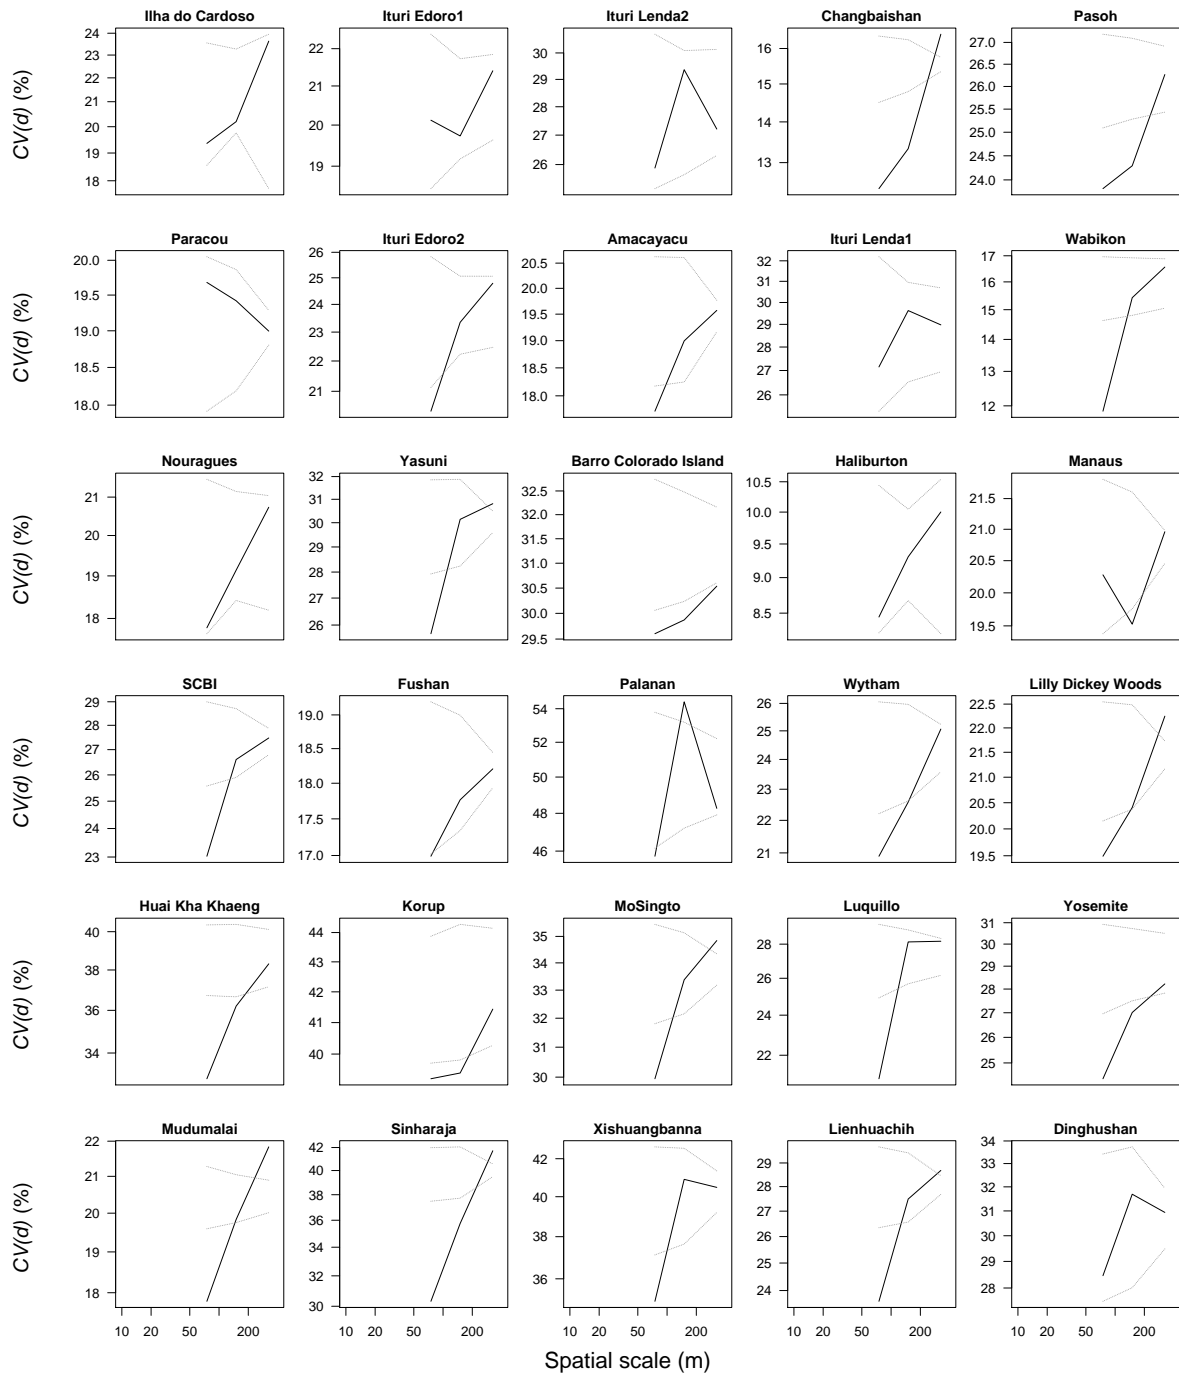

Figure S7. Variograms for AGBD in 50 x 50 m (0.25 ha) quadrats, for each site. For comparison purpose, variances were transformed into distance-specific coefficients of variation (CV(d); see methods). The grey dotted lines show the 95% confidence intervals on the null hypothesis of no spatial autocorrelation, as computed from 500 permutations (data values were randomly allocated to the spatial locations). Panels are ordered by elevation range. Note that the y axis varies among panels.

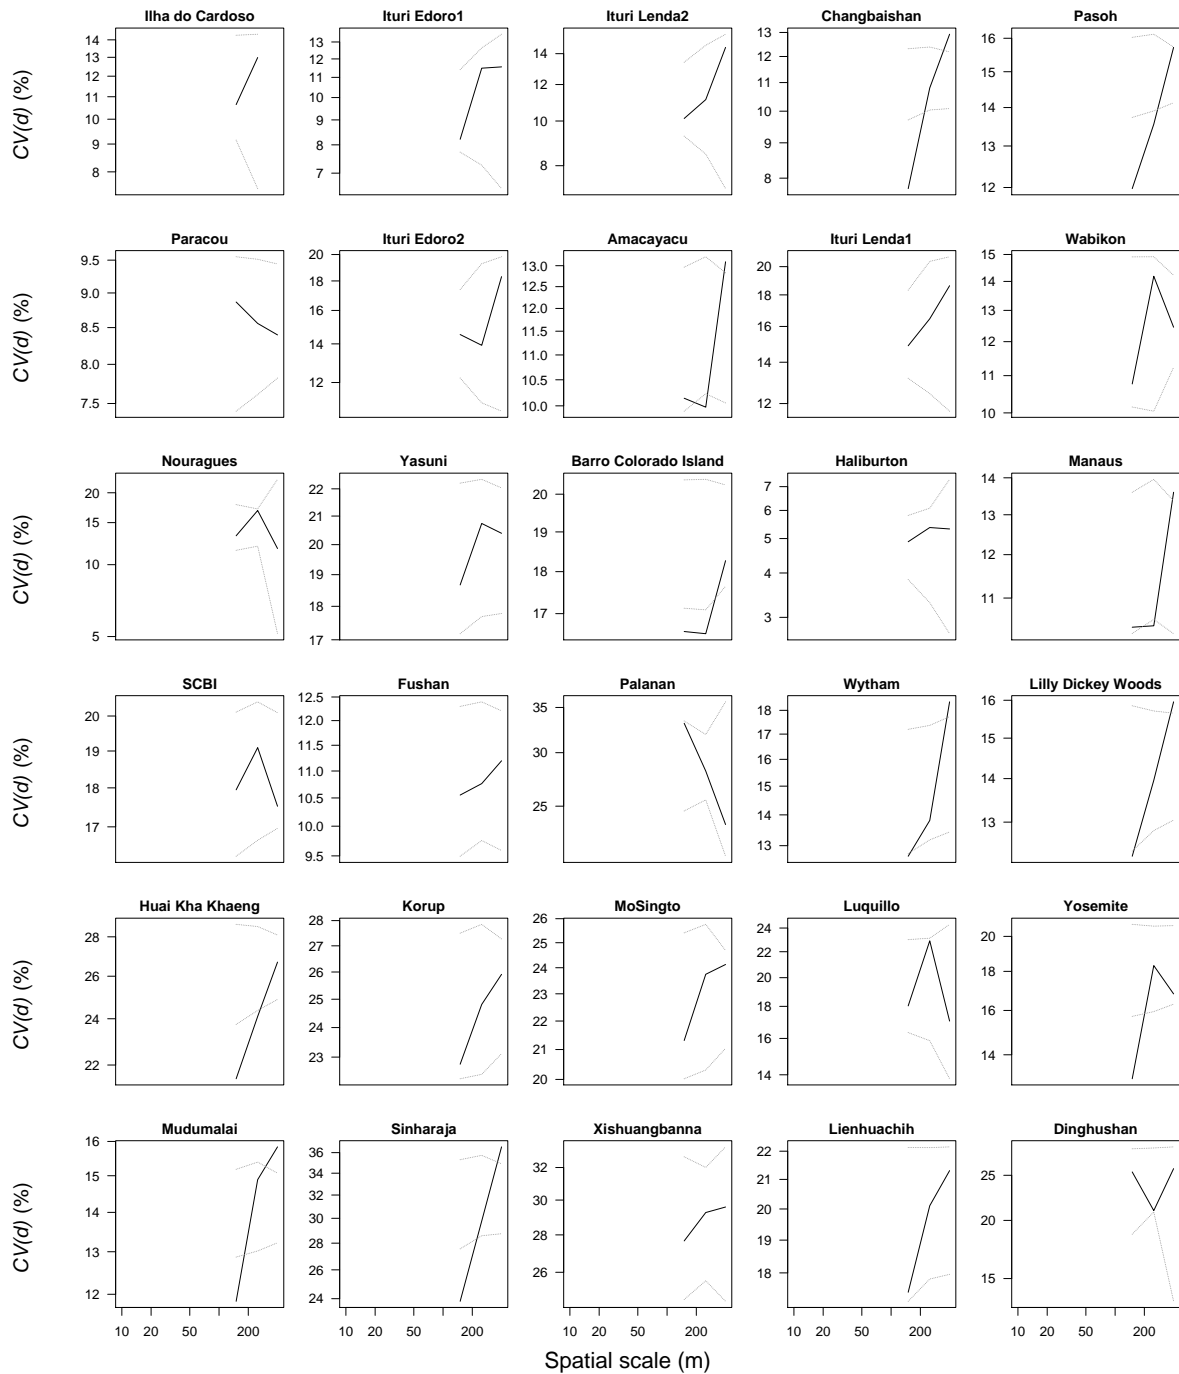

Figure S8. Variograms for AGBD in 100 x 100 m (1 ha) quadrats, for each site. For comparison purpose, variances were transformed into distance-specific coefficients of variation (CV(d); see methods). The grey dotted lines show the 95% confidence intervals on the null hypothesis of no spatial autocorrelation, as computed from 500 permutations (data values were randomly allocated to the spatial locations). Panels are ordered by elevation range. Note that the y axis varies among panels.

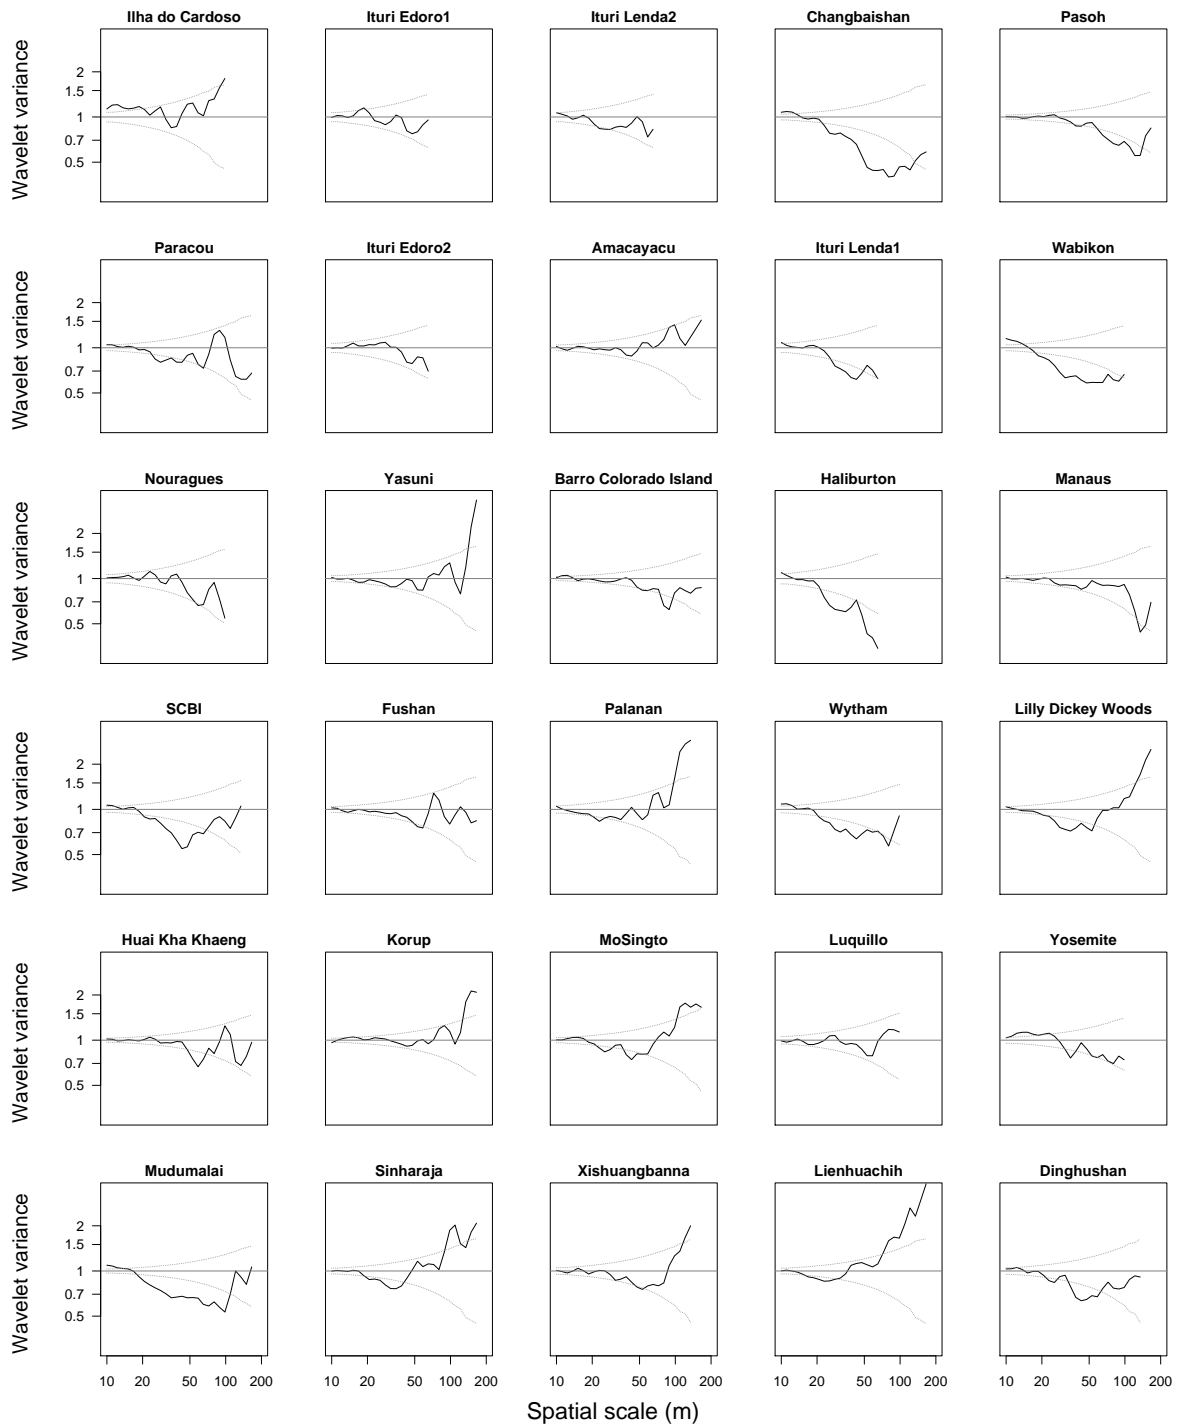

Figure S9. Scale-wise decomposition of spatial variation in AGBD within each site. The normalized wavelet variance computed for each site (solid black line) is contrasted with the value of 1 expected under no spatial structure (solid grey line). A higher wavelet variance indicates aggregation or clustering at a specific spatial scale (period), while a lower variance indicates dis-aggregation. The grey dotted lines show the 95% confidence intervals on the null hypothesis of no spatial structure, as computed from a chi-square distribution with  $k$  degrees of freedom, where  $k$  depends on the total area and the considered spatial scale. Panels are ordered by elevation range.

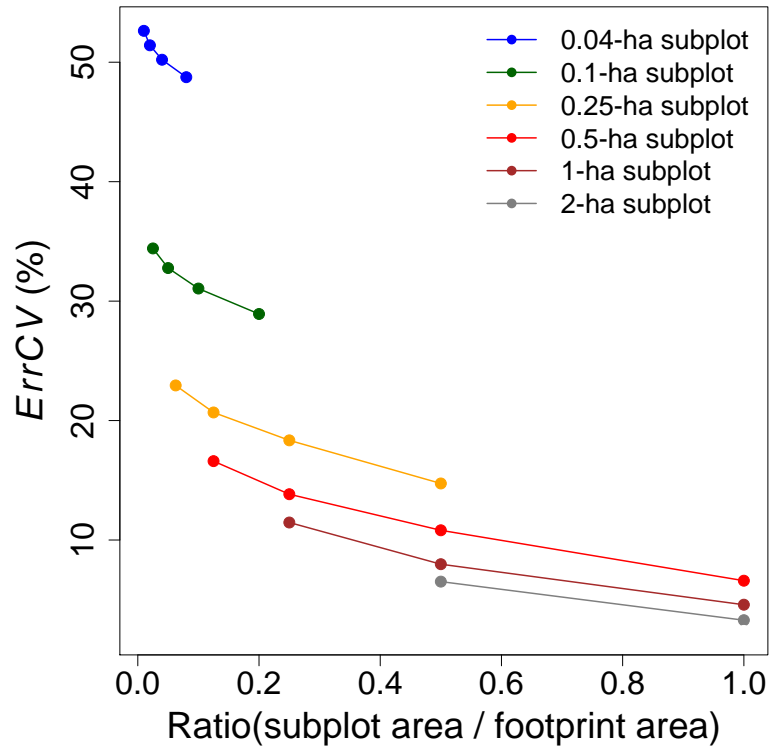

Figure S10. The mean error coefficient of variation (*ErrCV*) in AGBD as a function of the ratio of the subplot area to the remote sensing resolution for different subplot areas (see key). As illustrated here, for a same ratio of the field calibration plot area to the footprint area on the x axis, i.e. a same spatial representativeness of the subplot, the error due to the spatial mismatch is higher for small calibration plots. This figure is based on the simulation scheme described in figure 2.

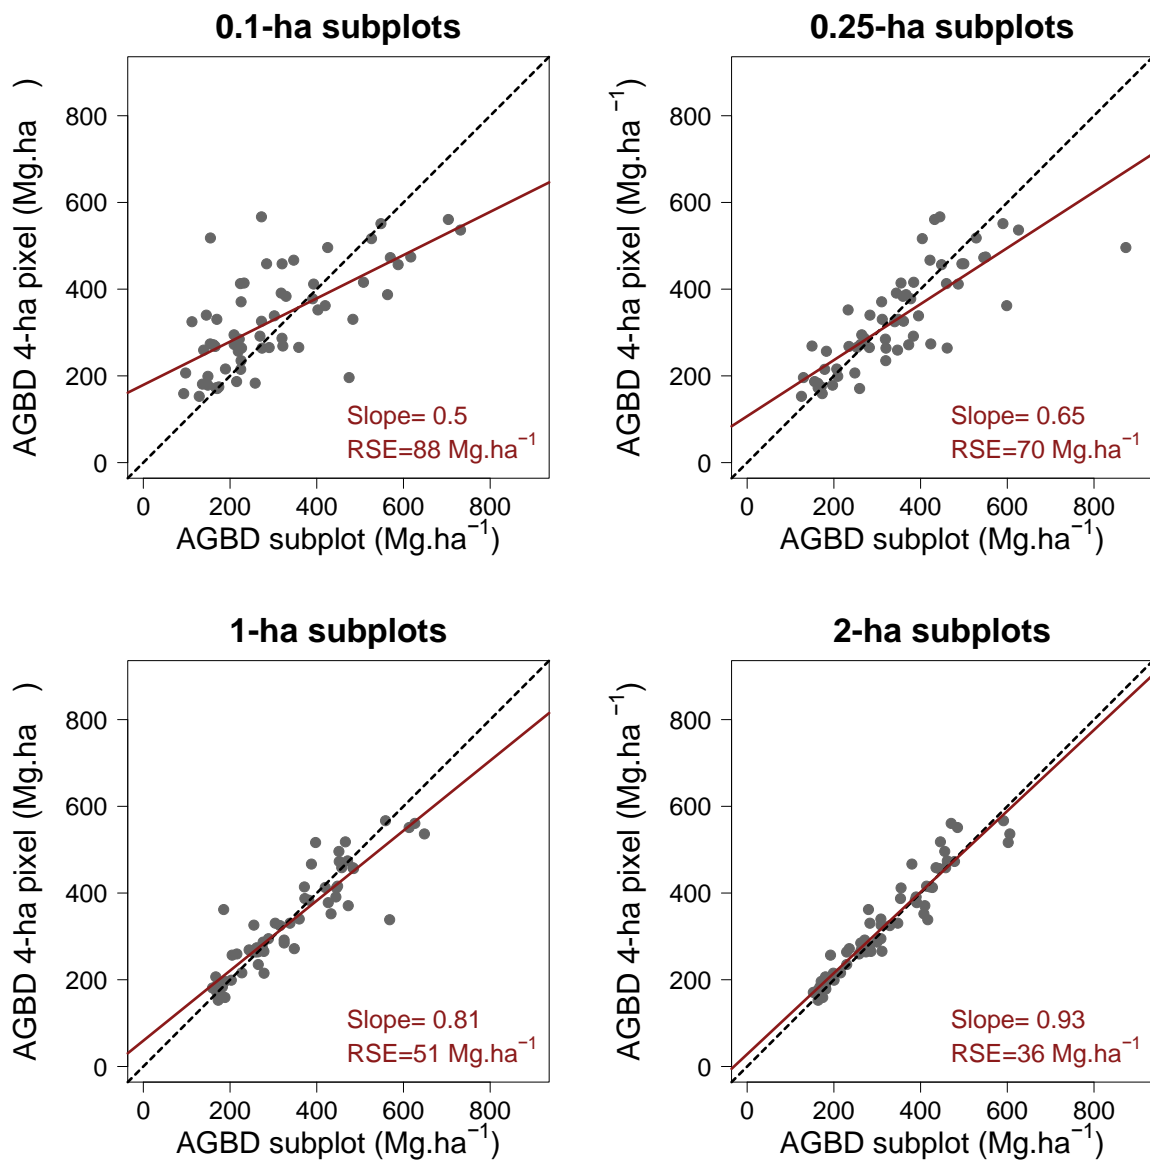

Figure S11. Propagation of field sampling errors to remote sensing products: an example randomly drawn from the 1,000 simulations. Panels illustrate the AGBD estimated within two 4-ha pixels randomly established in each large plot ( $n=60$ , dependent variable) and variable-size subplots located within the 4-ha pixels (independent variable). The regression line obtained from an OLS linear regression between the two AGBD estimates is shown on each figure (red line). The slope and the residual standard error (RSE) of the model are given in the key. The true slope is one (black dotted line).

## TABLES

Table S1. Study site characteristics.

| Site                                             | Country                      | Continent | Lat      | Long      | Plotdim (m) | Area (ha) | Forest type <sup>1</sup> | Elevation range (m) | Minimum dbh (cm) | Census year | WSG values <sup>§</sup> | Allometry used <sup>§</sup> | AGBD (Mg.ha <sup>-1</sup> ) |
|--------------------------------------------------|------------------------------|-----------|----------|-----------|-------------|-----------|--------------------------|---------------------|------------------|-------------|-------------------------|-----------------------------|-----------------------------|
| Amacayacu                                        | Colombia                     | America   | -3.80917 | -70.2679  | 500x500     | 25        | Tropical                 | 22                  | 1                | 2011        | 1                       | 2                           | 203.0                       |
| Barro Colorado Island                            | Panama                       | America   | 9.1543   | -79.8461  | 1000x500    | 50        | Tropical                 | 40                  | 1                | 2010        | 1                       | 2                           | 302.7                       |
| Changbaishan                                     | China (Jilin)                | Asia      | 42.3833  | 128.083   | 500x500     | 25        | Temperate                | 17.7                | 1                | 2009        | -                       | 3                           | 276.9                       |
| Dinghushan                                       | China (Guangdong)            | Asia      | 23.1695  | 112.511   | 400x500     | 20        | Subtropical              | 240                 | 1                | 2005        | 1                       | 2                           | 249.6                       |
| Fushan                                           | Taiwan                       | Asia      | 24.7614  | 121.555   | 500x500     | 25        | Subtropical              | 47                  | 1                | 2009        | 1                       | 2                           | 175.2                       |
| Haliburton                                       | Canada (Ontario)             | America   | 45.2901  | -78.6377  | 400x200*    | 8         | Temperate                | 50.9                | 1                | 2008        | -                       | 4                           | 175.5                       |
| Huai Kha Khaeng                                  | Thailand                     | Asia      | 15.6324  | 99.217    | 1000x500    | 50        | Tropical                 | 89                  | 1                | 2009        | 1                       | 2                           | 399.1                       |
| Ilha do Cardoso                                  | Brazil (São Paulo)           | America   | -25.0955 | -47.9573  | 300x300*    | 9         | Tropical                 | 5                   | 1                | 2009        | 1                       | 2                           | 276.7                       |
| Ituri Eodoro1                                    | Democratic Republic of Congo | Africa    | 1.4368   | 28.5826   | 200x500     | 10        | Tropical                 | 14                  | 1                | 2007        | 1                       | 2                           | 436.5                       |
| Ituri Eodoro2                                    | Democratic Republic of Congo | Africa    | 1.4368   | 28.5826   | 200x500     | 10        | Tropical                 | 21                  | 1                | 2007        | 1                       | 2                           | 432.7                       |
| Ituri Lenda1                                     | Democratic Republic of Congo | Africa    | 1.4368   | 28.5826   | 200x500     | 10        | Tropical                 | 24                  | 1                | 2007        | 1                       | 2                           | 542.1                       |
| Ituri Lenda2                                     | Democratic Republic of Congo | Africa    | 1.4368   | 28.5826   | 200x500     | 10        | Tropical                 | 16                  | 1                | 2007        | 1                       | 2                           | 555.4                       |
| Korup                                            | Cameroon                     | Africa    | 5.07389  | 8.85472   | 1000x500    | 50        | Tropical                 | 90                  | 1                | 2009        | 1                       | 2                           | 361.8                       |
| Lienhuachih                                      | Taiwan                       | Asia      | 23.9136  | 120.879   | 500x500     | 25        | Subtropical              | 174                 | 1                | 2007        | 1                       | 2                           | 188.6                       |
| Lilly Dickey Woods                               | USA (Indiana)                | America   | 39.2361  | -86.2204  | 500x500     | 25        | Temperate                | 72                  | 1                | 2012        | -                       | 4                           | 267.8                       |
| Luquillo                                         | Puerto Rico                  | America   | 18.3262  | -65.816   | 300x500*    | 15        | Tropical                 | 95                  | 1                | 2000        | 1                       | 2                           | 358.0                       |
| Manaus                                           | Brazil (Amazonas)            | America   | -2.4417  | -59.7858  | 500x500     | 25        | Tropical                 | 40                  | 1                | 2007        | 1                       | 2                           | 322.5                       |
| Mo Singto                                        | Thailand                     | Asia      | 14.4333  | 101.35    | 600x500     | 30        | Tropical                 | 90                  | 1                | 2005        | 1                       | 2                           | 310.1                       |
| Mudumalai                                        | India (Tamil Nadu)           | Asia      | 11.5989  | 76.5338   | 1000x500    | 50        | Tropical                 | 140                 | 1                | 1992        | 1                       | 2                           | 172.0                       |
| Nouragues                                        | French Guiana                | America   | 4.091944 | -52.67861 | 300x400     | 12        | Tropical                 | 29.9                | 10               | 2008        | 1                       | 2                           | 391.5                       |
| Palanan                                          | Philippines                  | Asia      | 17.0402  | 122.388   | 400x400     | 16        | Tropical                 | 55                  | 1                | 2010        | 1                       | 2                           | 444.6                       |
| Paracou                                          | French Guiana                | America   | 5.25     | -52.91667 | 500x500     | 25        | Tropical                 | 20.3                | 10               | 2009        | 1                       | 2                           | 405.4                       |
| Pasoh                                            | Malaysia                     | Asia      | 2.982    | 102.313   | 1000x500    | 50        | Tropical                 | 20                  | 1                | 1990        | 1                       | 2                           | 336.9                       |
| SCBI: Smithsonian Conservation Biology Institute | USA (Virginia)               | America   | 38.8916  | -78.1457  | 400x600*    | 24        | Temperate                | 43                  | 1                | 2008        | -                       | 4                           | 255.0                       |
| Sinharaja                                        | Sri Lanka                    | Asia      | 6.4023   | 80.4023   | 500x500     | 25        | Tropical                 | 151                 | 1                | 2002        | 1                       | 2                           | 563.9                       |
| Wabikon Lake Forest                              | USA (Wisconsin)              | America   | 45.5508  | -88.7964  | 300x800*    | 24        | Temperate                | 25.9                | 1                | 2008        | -                       | 4                           | 179.9                       |
| Wytham woods                                     | UK                           | Europe    | 51.7743  | -1.3379   | 300x600     | 18        | Temperate                | 60                  | 1                | 2010        | -                       | 5                           | 195.5                       |
| Xishuangbanna                                    | China (Yunnan)               | Asia      | 21.6117  | 101.574   | 400x500     | 20        | Tropical                 | 160                 | 1                | 2007        | 1                       | 2                           | 424.7                       |
| Yasuni                                           | Ecuador                      | America   | -0.6859  | -76.3953  | 500x500     | 25        | Tropical                 | 30                  | 1                | 2002        | 1                       | 2                           | 285.2                       |
| Yosemite National Park                           | USA (California)             | America   | 37.7662  | -119.819  | 800x300*    | 24        | Temperate                | 137.2               | 1                | 2010        | -                       | 6                           | 545.8                       |

\* Only a subset of the plot of these dimensions was employed in our analyses, some of which required that both plot dimensions be multiples of 100.

§ 1-Chave *et al.* (2009); 2-Chave *et al.* (2005); 3-Wang *et al.* (2006); 4-Jenkins *et al.* (2003); 5-see Fenn *et al.* (2010); 6-Lutz *et al.* (2012)

<sup>1</sup> Forest types were derived from Fischer *et al.* (2012) but due to its high elevation, the Yosemite forest has been considered as a temperate forest, instead of a subtropical one (see Fig.1 of the paper).

Table S2. Coefficient of variation (*CV*) of AGBD (in %) according to subplot size in each study plot. The mean *CV* across plots is given at the end of the table for each subplot size.

| Field plots           | 5 m<br>x<br>5 m | 10 m<br>x<br>10 m | 12.5 m<br>x<br>12.5 m | 20 m<br>x<br>20 m | 25 m<br>x<br>25 m | 50 m<br>x<br>50 m | 100 m<br>x<br>100 m | 125 m<br>x<br>125 m | 166.7 m<br>x<br>166.7 m | 250 m<br>x<br>250 m |
|-----------------------|-----------------|-------------------|-----------------------|-------------------|-------------------|-------------------|---------------------|---------------------|-------------------------|---------------------|
| Amacayacu             | 169.51          | 84.44             | 70.18                 | 43.84             | 35.28             | 19.45             | 11.58               | 11.78               | 8.90                    | 7.09                |
| Barro Colorado Island | 322.79          | 160.09            | 124.57                | 77.70             | 62.14             | 31.40             | 18.62               | 17.57               | 14.30                   | 11.75               |
| Changbaishan          | 173.17          | 80.42             | 61.12                 | 36.03             | 27.74             | 14.71             | 9.83                | 9.88                | 9.26                    | 9.39                |
| Dinghushan            | 226.08          | 107.61            | 87.27                 | 53.36             | 45.42             | 30.82             | 23.96               | -                   | -                       | -                   |
| Fushan                | 180.30          | 87.81             | 71.00                 | 42.96             | 35.16             | 16.07             | 9.14                | 5.66                | 3.50                    | 1.87                |
| Haliburton            | 127.33          | 55.66             | 41.52                 | 25.93             | 18.79             | 9.40              | 5.10                | -                   | -                       | -                   |
| Huai Kha Khaeng       | 341.81          | 170.43            | 134.84                | 85.07             | 68.59             | 37.33             | 24.38               | 22.02               | 17.41                   | 16.03               |
| Ilha do Cardoso       | 155.28          | 78.01             | 61.45                 | 41.47             | 32.50             | 21.30             | 11.74               | -                   | -                       | -                   |
| Ituri Egoro1          | 262.68          | 128.47            | 101.42                | 62.22             | 46.66             | 18.69             | 8.77                | -                   | -                       | -                   |
| Ituri Egoro2          | 265.75          | 128.64            | 104.02                | 57.08             | 49.75             | 22.15             | 14.26               | -                   | -                       | -                   |
| Ituri Lenda1          | 259.95          | 122.20            | 98.72                 | 55.87             | 46.12             | 28.41             | 16.17               | -                   | -                       | -                   |
| Ituri Lenda2          | 235.01          | 111.42            | 90.92                 | 51.11             | 48.99             | 26.81             | 10.68               | -                   | -                       | -                   |
| Korup                 | 345.59          | 180.31            | 140.24                | 88.67             | 72.99             | 40.27             | 25.53               | 20.08               | 18.82                   | 13.66               |
| Lienhuachih           | 180.23          | 91.86             | 75.91                 | 51.87             | 45.19             | 28.01             | 19.97               | 19.11               | 15.83                   | 13.46               |
| Lilly Dickey Woods    | 183.16          | 88.83             | 69.62                 | 44.20             | 37.29             | 21.45             | 14.30               | 10.98               | 12.73                   | 8.26                |
| Luquillo              | 230.76          | 116.36            | 94.81                 | 60.07             | 48.53             | 29.29             | 17.73               | -                   | -                       | -                   |
| Manaus                | 219.60          | 107.05            | 85.76                 | 51.31             | 42.96             | 20.71             | 12.06               | 10.43               | 9.32                    | 3.82                |
| MoSingto              | 237.24          | 116.74            | 93.95                 | 61.06             | 50.37             | 29.82             | 19.81               | -                   | -                       | -                   |
| Mudumalai             | 197.80          | 91.78             | 71.85                 | 44.61             | 35.90             | 20.83             | 14.27               | 11.83               | 11.01                   | 7.27                |
| Nouragues             | 238.87          | 117.52            | 93.16                 | 55.09             | 46.15             | 19.72             | 14.69               | -                   | -                       | -                   |
| Palanan               | 274.28          | 139.79            | 114.34                | 79.58             | 69.03             | 49.74             | 29.93               | -                   | -                       | -                   |
| Paracou               | 209.01          | 101.47            | 79.08                 | 48.94             | 39.66             | 19.03             | 8.61                | 7.95                | 4.89                    | 0.94                |
| Pasoh                 | 264.98          | 130.06            | 103.31                | 62.52             | 49.04             | 25.54             | 14.85               | 13.29               | 11.63                   | 9.98                |
| SCBI                  | 240.22          | 113.79            | 90.52                 | 54.86             | 46.78             | 27.28             | 18.56               | -                   | -                       | -                   |
| Sinharaja             | 216.91          | 108.54            | 88.76                 | 60.25             | 52.82             | 35.42             | 28.39               | 26.58               | 24.98                   | 22.01               |
| Wabikon               | 112.08          | 51.30             | 40.66                 | 26.59             | 23.24             | 15.87             | 12.63               | -                   | -                       | -                   |
| Wytham                | 224.59          | 104.72            | 82.15                 | 48.47             | 40.33             | 24.35             | 15.34               | -                   | -                       | -                   |
| Xishuangbanna         | 270.57          | 133.49            | 109.81                | 71.85             | 63.58             | 40.28             | 29.03               | -                   | -                       | -                   |
| Yasuni                | 203.75          | 102.22            | 83.93                 | 54.36             | 44.61             | 28.48             | 18.80               | 17.61               | 16.86                   | 10.13               |
| Yosemite              | 254.02          | 125.91            | 99.44                 | 59.47             | 47.68             | 29.09             | 18.33               | -                   | -                       | -                   |
| <b>MEAN</b>           | <b>227.44</b>   | <b>111.23</b>     | <b>88.81</b>          | <b>55.21</b>      | <b>45.78</b>      | <b>26.06</b>      | <b>16.57</b>        | <b>14.63</b>        | <b>12.82</b>            | <b>9.69</b>         |



Table S3. Coefficients of the linear regression of the logarithm of the coefficient of variation,  $CV$ , in AGBD against the logarithm of plot area for each site. In the absence of spatial autocorrelation in AGBD,  $CV(s) = CV(1)/s^\gamma$  with  $\gamma = 1/2$ . Positive spatial autocorrelation should yield  $\gamma < 1/2$ ; negative spatial autocorrelation  $\gamma > 1/2$ . Slopes that are significantly different from  $1/2$  are highlighted in bold; those that are significantly higher with bold italics.

| Site                                                | R <sup>2</sup> | Intercept | $\gamma$     | CI $\gamma$ |
|-----------------------------------------------------|----------------|-----------|--------------|-------------|
| Amacayacu                                           | 0.997          | 2.374     | <b>0.45</b>  | 0.421-0.479 |
| Barro Colorado Island                               | 0.997          | 2.837     | 0.482        | 0.451-0.513 |
| Changbaishan                                        | 0.986          | 2.102     | 0.489        | 0.421-0.557 |
| Dinghushan                                          | 0.954          | 2.951     | <b>0.375</b> | 0.280-0.471 |
| Fushan                                              | 0.998          | 2.153     | 0.505        | 0.481-0.528 |
| Haliburton                                          | 0.996          | 1.532     | 0.539        | 0.499-0.579 |
| Huai Kha Khaeng                                     | 0.992          | 3.068     | <b>0.447</b> | 0.401-0.493 |
| Ilha do Cardoso                                     | 0.993          | 2.413     | <b>0.423</b> | 0.381-0.464 |
| Ituri Egoro 1                                       | 0.997          | 2.195     | <b>0.576</b> | 0.543-0.610 |
| Ituri Egoro 2                                       | 0.993          | 2.526     | 0.502        | 0.452-0.552 |
| Ituri Lenda 1                                       | 0.988          | 2.677     | 0.461        | 0.403-0.519 |
| Ituri Lenda 2                                       | 0.992          | 2.451     | 0.497        | 0.446-0.548 |
| Korup                                               | 0.994          | 3.135     | <b>0.441</b> | 0.401-0.480 |
| Lienhuachih                                         | 0.983          | 2.866     | <b>0.365</b> | 0.310-0.419 |
| Lilly Dickey Woods                                  | 0.987          | 2.519     | <b>0.426</b> | 0.369-0.484 |
| Luquillo                                            | 0.993          | 2.787     | <b>0.428</b> | 0.388-0.468 |
| Manaus                                              | 0.998          | 2.413     | 0.49         | 0.462-0.518 |
| Mo Singto                                           | 0.988          | 2.858     | <b>0.415</b> | 0.363-0.467 |
| Mudumalai                                           | 0.982          | 2.483     | 0.442        | 0.372-0.511 |
| Nouragues                                           | 0.986          | 2.506     | 0.485        | 0.420-0.551 |
| Palanan                                             | 0.982          | 3.336     | <b>0.355</b> | 0.299-0.411 |
| Paracou                                             | 1              | 2.186     | <b>0.529</b> | 0.516-0.541 |
| Pasoh                                               | 0.997          | 2.611     | 0.487        | 0.455-0.519 |
| SCBI: Smithsonian Conservation<br>Biology Institute | 0.982          | 2.758     | <b>0.429</b> | 0.362-0.496 |
| Sinharaja                                           | 0.958          | 3.151     | <b>0.338</b> | 0.256-0.419 |
| Wabikon Lake Forest                                 | 0.943          | 2.305     | <b>0.359</b> | 0.258-0.461 |
| Wytham woods                                        | 0.983          | 2.582     | 0.447        | 0.381-0.514 |
| Xishuangbanna                                       | 0.976          | 3.215     | <b>0.369</b> | 0.303-0.436 |
| Yasuni                                              | 0.986          | 2.811     | <b>0.396</b> | 0.342-0.451 |
| Yosemite National Park                              | 0.987          | 2.774     | 0.442        | 0.384-0.500 |

Table S4. Topographic structure of the world ecological zones by continents. Metrics were calculated using maps at 3 arc minutes of resolution (~5.6 km<sup>2</sup>). The global ecological zoning of the FAO (2001) was used to classify ecological zones. Slope and elevation were estimated from the SRTM 30+ / ETOPO1 Global Relief Model (Amante & Eakins, 2009) and continents were assigned based on the global administrative area (<http://www.gadm.org/>). All these analyses were conducted with the R statistical software (R Development Core Team, 2012) using freely available global maps provided by the spatial-analyst.net project (<http://spatial-analyst.net/>).

| FAO Ecological zones            | Africa     |                |            |                   | Asia       |                |            |                   | Europe     |                |            |                   | North America |                |            |                   |
|---------------------------------|------------|----------------|------------|-------------------|------------|----------------|------------|-------------------|------------|----------------|------------|-------------------|---------------|----------------|------------|-------------------|
|                                 | % of cover | Mean elevation | Mean slope | % of steep slope* | % of cover | Mean elevation | Mean slope | % of steep slope* | % of cover | Mean elevation | Mean slope | % of steep slope* | % of cover    | Mean elevation | Mean slope | % of steep slope* |
| Polar                           |            |                |            |                   | 8.8        | 197            | 0.004      | 19                | 0.1        | 224            | 0.010      | 65                | 38.7          | 946            | 0.005      | 20                |
| Boreal coniferous forest        |            |                |            |                   | 16         | 218            | 0.003      | 8                 | 15.9       | 253            | 0.005      | 23                | 8.1           | 416            | 0.003      | 13                |
| Boreal mountain system          |            |                |            |                   | 12.5       | 731            | 0.013      | 72                | 8.8        | 640            | 0.015      | 73                | 5.8           | 945            | 0.018      | 81                |
| Boreal tundra woodland          |            |                |            |                   | 5          | 310            | 0.007      | 36                |            | 156            | 0.005      | 31                | 11.4          | 315            | 0.004      | 13                |
| Temperate continental forest    |            |                |            |                   | 6.6        | 210            | 0.005      | 18                | 29.3       | 212            | 0.005      | 18                | 6.2           | 287            | 0.004      | 12                |
| Temperate desert                |            |                |            |                   | 8.7        | 677            | 0.005      | 23                | 0.5        | 93             | 0.006      | 34                | 2.2           | 1523           | 0.019      | 76                |
| Temperate mountain system       |            |                |            |                   | 8          | 2596           | 0.026      | 85                | 7.2        | 1129           | 0.033      | 94                | 6.6           | 1281           | 0.026      | 90                |
| Temperate oceanic forest        |            |                |            |                   |            |                |            |                   | 20.3       | 179            | 0.006      | 25                | 0.1           | 226            | 0.014      | 63                |
| Temperate steppe                |            |                |            |                   | 6.2        | 453            | 0.004      | 18                | 4.1        | 96             | 0.003      | 3                 | 6.7           | 699            | 0.003      | 8                 |
| Subtropical desert              |            |                |            |                   | 2.3        | 562            | 0.004      | 15                |            |                |            |                   | 2.8           | 977            | 0.016      | 70                |
| Subtropical dry forest          | 1.3        | 561            | 0.018      | 81                | 0.2        | 483            | 0.026      | 88                | 10.8       | 453            | 0.018      | 74                | 0.2           | 158            | 0.011      | 47                |
| Subtropical humid forest        | 0.3        | 469            | 0.015      | 86                | 3.1        | 429            | 0.017      | 69                | 0.2        | 238            | 0.022      | 72                | 2.8           | 89             | 0.002      | 2                 |
| Subtropical mountain system     | 1.5        | 1557           | 0.017      | 64                | 5.6        | 2574           | 0.038      | 96                | 2.7        | 1202           | 0.029      | 88                | 1.6           | 1509           | 0.027      | 91                |
| Subtropical steppe              | 1.7        | 620            | 0.009      | 43                | 1.9        | 883            | 0.017      | 67                | 0.1        | 313            | 0.056      | 99                | 3             | 942            | 0.008      | 33                |
| Tropical desert                 | 30.6       | 449            | 0.004      | 14                | 4          | 470            | 0.006      | 22                |            |                |            |                   |               |                |            |                   |
| Tropical dry forest             | 12.1       | 644            | 0.005      | 23                | 2.1        | 248            | 0.006      | 26                |            |                |            |                   | 0.5           | 543            | 0.023      | 81                |
| Tropical moist deciduous forest | 15.1       | 737            | 0.006      | 26                | 2          | 318            | 0.014      | 53                |            |                |            |                   | 1.6           | 301            | 0.016      | 46                |
| Tropical mountain system        | 4.8        | 1549           | 0.025      | 87                | 1.2        | 1411           | 0.045      | 98                |            |                |            |                   | 0.6           | 1729           | 0.043      | 97                |
| Tropical rainforest             | 12.8       | 484            | 0.005      | 22                | 4.1        | 256            | 0.018      | 57                |            |                |            |                   | 1             | 415            | 0.027      | 75                |
| Tropical shrubland              | 19.7       | 611            | 0.005      | 18                | 1.7        | 353            | 0.005      | 18                |            |                |            |                   | 0.1           | 376            | 0.040      | 100               |

\* percentage of area with a slope superior to the 75 percentile of all the slope observed in the world's land area ( $\geq 0.068^\circ$  at 3 arc-min resolution)

Table S4 (continued).

| Oceania    |                |            |                   | South America |                |            |                   |
|------------|----------------|------------|-------------------|---------------|----------------|------------|-------------------|
| % of cover | Mean elevation | Mean slope | % of steep slope* | % of cover    | Mean elevation | Mean slope | % of steep slope* |
| 2.6        | 848            | 0.024      | 89                | 0.6           | 1084           | 0.037      | 98                |
| 3          | 348            | 0.018      | 73                | 1.9           | 417            | 0.026      | 87                |
|            |                |            |                   | 3.8           | 544            | 0.011      | 55                |
| 48.5       | 304            | 0.002      | 3                 |               |                |            |                   |
| 1.6        | 181            | 0.005      | 21                | 0.7           | 538            | 0.022      | 73                |
| 3.5        | 304            | 0.013      | 70                | 7.5           | 252            | 0.004      | 18                |
|            |                |            |                   | 1.5           | 2751           | 0.053      | 100               |
| 18         | 226            | 0.003      | 11                | 4.2           | 566            | 0.010      | 35                |
|            |                |            |                   | 0.8           | 788            | 0.027      | 89                |
| 5          | 136            | 0.005      | 22                | 9.3           | 357            | 0.007      | 29                |
| 0.3        | 53             | 0.004      | 13                | 23.6          | 351            | 0.006      | 26                |
| 0.8        | 2086           | 0.062      | 100               | 10.3          | 2627           | 0.045      | 93                |
| 5          | 347            | 0.029      | 71                | 35.3          | 200            | 0.005      | 14                |
| 11.8       | 232            | 0.004      | 13                | 0.6           | 570            | 0.028      | 72                |

## **References cited in supplementary information:**

Amante, C. and Eakins, B. W.: ETOPO1 1 Arc-minute global relief model: procedure, data sources and analysis, National Geophysical Data Center. Marine Geology and Geophysics Division, Boulder, Colorado., 2009.

Chave, J., Andalo, C., Brown, S., Cairns, M., Chambers, J., Eamus, D., Fölster, H., Fromard, F., Higuchi, N., Kira, T., Lescure, J.-P., Nelson, B., Ogawa, H., Puig, H., Riéra, B. and Yamakura, T.: Tree allometry and improved estimation of carbon stocks and balance in tropical forests, *Oecologia*, 145(1), 87–99, doi:10.1007/s00442-005-0100-x, 2005.

Chave, J., Coomes, D., Jansen, S., Lewis, S. L., Swenson, N. G. and Zanne, A. E.: Towards a worldwide wood economics spectrum, *Ecology Letters*, 12(4), 351–366, 2009.

FAO: Global Ecological Zoning for the Global Forest Resources Assessment 2000, FAO, Rome., 2001.

Fischer, G., Nachtergaele, F. O., Prieler, S., Teixeira, E., Tóth, G., Velthuizen, H., Verelst, L. and Wiberg, D.: Global Agro-Ecological Zones (GAEZ v3. 0), Laxenburg, Austria: International Institute for Applied Systems Analysis, 2012.

Fenn, K., Malhi, Y., Morecroft, M., Lloyd, C. and Thomas, M.: Comprehensive description of the carbon cycle of an ancient temperate broadleaved woodland, *Biogeosciences Discuss.*, 7(3), 3735–3763, doi:10.5194/bgd-7-3735-2010, 2010.

Jenkins J.C., Chojnacky D.C., Heath L.S. and Birdsey R.A.: National-Scale Biomass Estimators for United States Tree Species, *Forest Science*, 49(1), 12–35, 2003.

Lutz, J. A., Larson, A. J., Swanson, M. E. and Freund, J. A.: Ecological Importance of Large-Diameter Trees in a Temperate Mixed-Conifer Forest, *PLoS ONE*, 7(5), e36131, doi:10.1371/journal.pone.0036131, 2012.

Percival, D. P.: On estimation of the wavelet variance, *Biometrika*, 82(3), 619–631, doi:10.1093/biomet/82.3.619, 1995.

R Development Core Team: R: A language and environment for statistical computing., Vienna, Austria., 2012.

Wang, C.: Biomass allometric equations for 10 co-occurring tree species in Chinese temperate forests, *Forest Ecology and Management*, 222(1–3), 9–16, doi:10.1016/j.foreco.2005.10.074, 2006.
